# Supplementary material
Source: publisher figshare collection journal article supplement (https://karger.figshare.com/ndownloader/files/17436014)
Supplement: Supplementary file 1 [file 17436014]

**Supplemental Table S1**. Equation for estimation of combined mean and standard deviation for data analysis.

| Estimate | Equation |
| --- | --- |
| Combined mean |  |
| Combined Standard Deviation |  |
| SD (when only mean or median with range were reported) |  |
| SD (when only the interquartile range was reported) |  |
| SD (when only 95% CI was detailed) |  |

Note: CI, confidence interval; D, mean difference between combined mean and individual mean values; N, number of observations/subjects; Q, quartile; X, mean value.

**Supplemental Figure S1.** Funnel plots for publication bias of studies included in meta-analysis divided for cerebrospinal fluid (A) and serum/plasma (B) specimens.

**Supplemental Figure S2.** Copper levels taking into account only shorter PD duration patients in Hegde, 2004 and Boll, 1999.

**Supplemental Figure S3.** Iron levels taking into account only shorter PD duration patients in Hegde, 2004.

**Supplemental Figure S4.** Zinc levels taking into account only shorter PD duration patients in Hegde, 2004.
